# Supplementary material for: A highly active hydrazine fuel cell catalyst consisting of a Ni–Fe nanoparticle alloy plated on carbon materials by pulse reversal
Source: Royal Society of Chemistry journal article supplement (doi:10.1039/c2ra01346k), 2012-01-01
Supplement: c2ra01346k.pdf [file c2ra01346k.pdf]

# Supporting information

## A Highly Active Hydrazine Fuel Cell Catalyst Consisting of Ni-Fe Nanoparticle Alloy pulse reversal plated on Carbon Materials

---

Haidong Yang, Xing Zhong, Zhengping Dong, Jia Wang, Jun Jin,\* and Jiantai Ma\*

State Key Laboratory of Applied Organic Chemistry, Lanzhou University, Lanzhou 730000, (P.R. China)

### The detailed of pulse reversal plating

An electrochemical cell with a two-electrode configuration was used for the experiments. A copper plate (10mm×10mm×1mm) was used as the cathode and a glass carbon electrode (3mm) which loaded the carbon material used as anode. After plating 23 seconds, wash the electrode with deionized water and then dried the electrode.

**Table S1**

Nickel iron pulse reversal plating chemistry

| Nickel iron pulse reversal plating chemistry |         |
|----------------------------------------------|---------|
| Nickel(II) sulfate                           | 250g/l  |
| Iron(II) sulfate                             | 25.6g/l |
| Boric acid                                   | 40g/l   |
| Sodium chloride                              | 25g/l   |
| Saccharim                                    | 2g/l    |
| Sodium citrate                               | 14.7g/l |

|                                 |         |
|---------------------------------|---------|
| Ascorbic acid                   | 0.5g/l  |
| 2-Butyne-1,4-diol               | 0.6g/l  |
| Sodium dodecylbenzenesulphonate | 0.05g/l |

**Table S2**

Pulse reversal plating conditions

Nickel iron plating bath conditions

|                                  |                        |
|----------------------------------|------------------------|
| Temperature                      | 60°C                   |
| pH                               | 4.2                    |
| Plating time                     | 23s                    |
| Average current density          | 5A/dm <sup>2</sup>     |
| Positive pulse time              | 3ms                    |
| Positive duty circle             | 0.3                    |
| Positive average current density | 5.55 A/dm <sup>2</sup> |
| Reverse pulse time               | 3ms                    |
| Reverse duty circle              | 0.1                    |
| Reverse average current density  | 0.55 A/dm <sup>2</sup> |

Mild agitation.

**Table S3**

**Inductively coupled plasma spectrometry (ICP) derived compositions of the most active catalysts**

| Inductively coupled plasma spectrometry (ICP) derived compositions of the most active catalysts |                                       |                                               |
|-------------------------------------------------------------------------------------------------|---------------------------------------|-----------------------------------------------|
| The concentration of Nickel(II) sulfate (g/L)                                                   | The quality of Iron(II) sulfate (g/L) | The compositions of the most active catalysts |
| 250                                                                                             | 5                                     | Ni <sub>95.7</sub> Fe <sub>4.3</sub>          |
| 250                                                                                             | 10                                    | Ni <sub>93.1</sub> Fe <sub>6.9</sub>          |
| 250                                                                                             | 15                                    | Ni <sub>92.0</sub> Fe <sub>8.0</sub>          |
| 250                                                                                             | 20                                    | Ni <sub>90.4</sub> Fe <sub>9.6</sub>          |
| 250                                                                                             | 25                                    | Ni <sub>86.1</sub> Fe <sub>13.9</sub>         |
| 250                                                                                             | 30                                    | Ni <sub>80.8</sub> Fe <sub>19.2</sub>         |
| 250                                                                                             | 35                                    | Ni <sub>73.7</sub> Fe <sub>26.3</sub>         |
| 250                                                                                             | 40                                    | Ni <sub>71.2</sub> Fe <sub>28.8</sub>         |
| 250                                                                                             | 45                                    | Ni <sub>67.4</sub> Fe <sub>32.6</sub>         |
| 250                                                                                             | 50                                    | Ni <sub>66.1</sub> Fe <sub>33.9</sub>         |
| 250                                                                                             | 55                                    | Ni <sub>62.6</sub> Fe <sub>37.4</sub>         |
| 250                                                                                             | 60                                    | Ni <sub>59.2</sub> Fe <sub>40.8</sub>         |
| 250                                                                                             | 65                                    | Ni <sub>58.0</sub> Fe <sub>42.0</sub>         |
| 250                                                                                             | 70                                    | Ni <sub>54.9</sub> Fe <sub>45.1</sub>         |
| 250                                                                                             | 75                                    | Ni <sub>54.7</sub> Fe <sub>45.3</sub>         |

**Figure S1**  
**EDX images of MWCNTs-based and graphene-based Ni-Fe nanoparticles.**

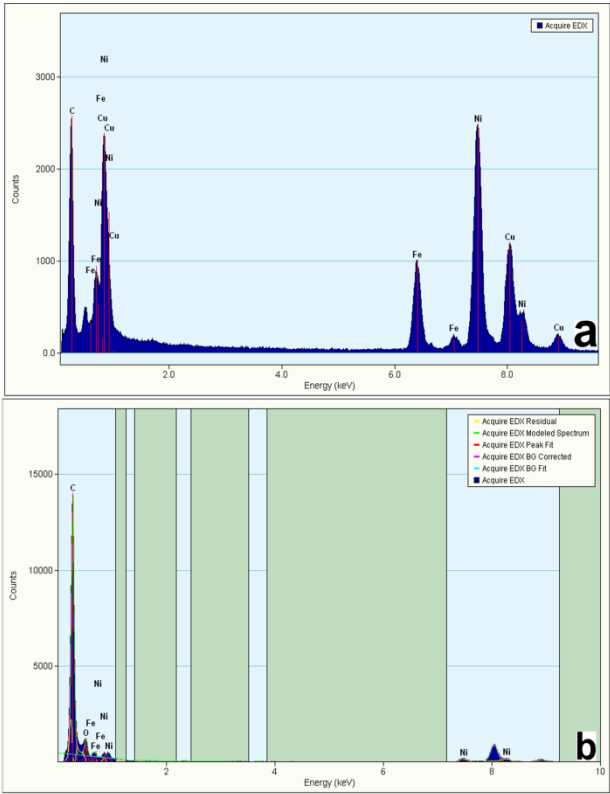

**Figure 1.** EDX images of (a) MWCNT-based Ni-Fe nanoparticles, (b) graphene-based Ni-Fe nanoparticles.
